# Supplementary material for: Vascular NRP2 triggers PNET angiogenesis by activating the SSH1-cofilin axis
Source: PubMed Central journal article supplement (PMC7509939; doi:10.1186/s13578-020-00472-6), 2020-09-23

# Supplemental figure 4

## A

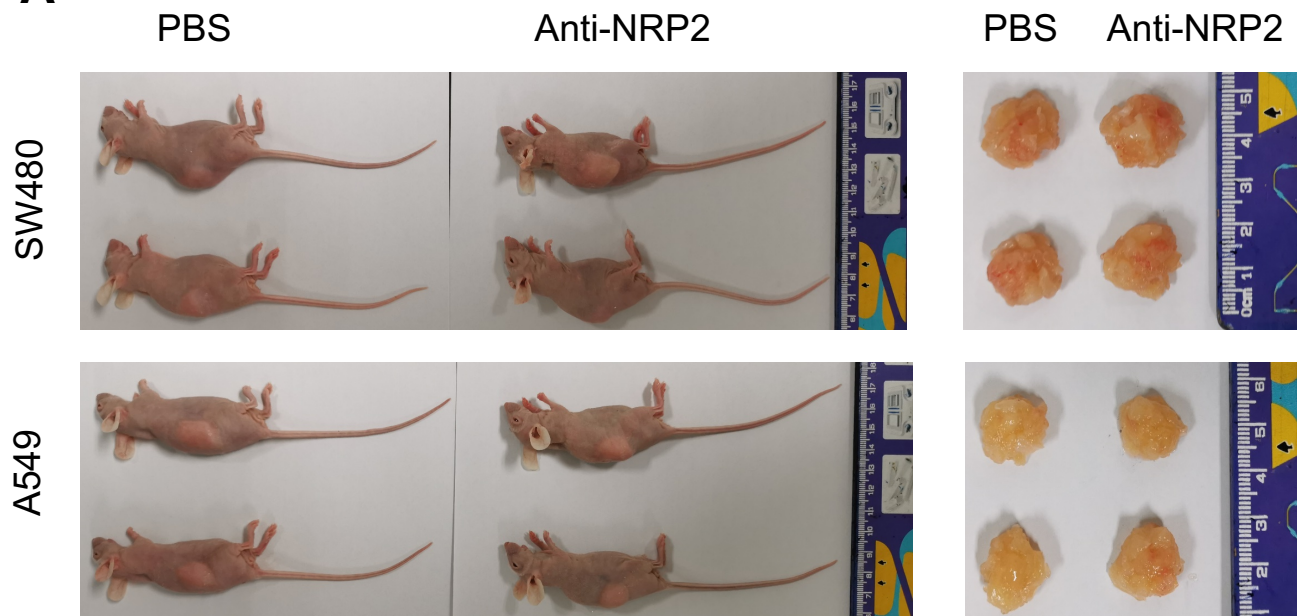

## B

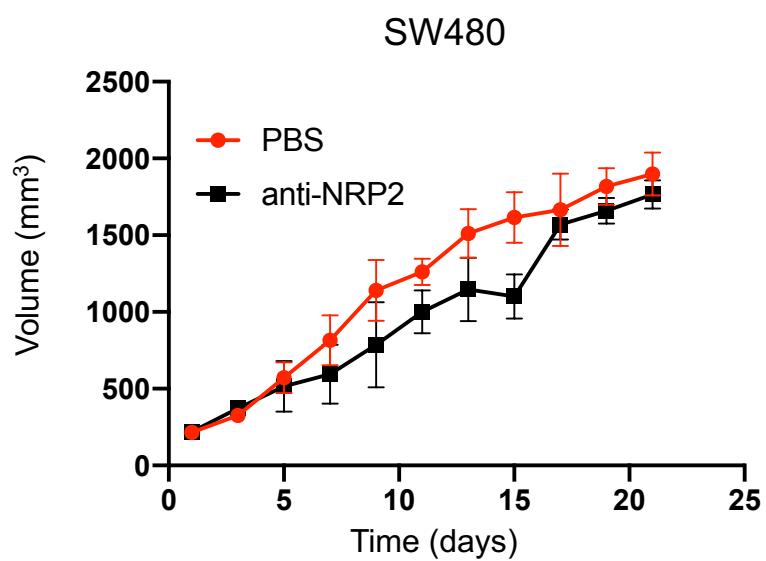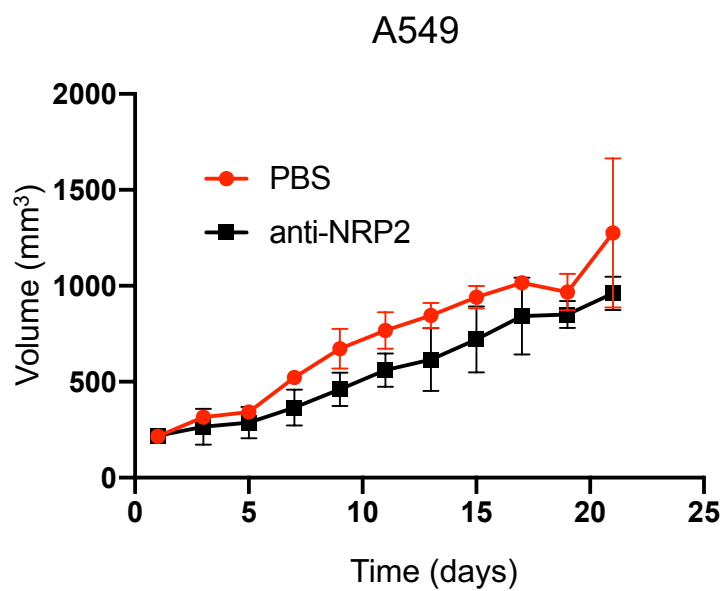

Supplement: 13578_2020_472_MOESM4_ESM.pdf [file 13578_2020_472_MOESM4_ESM.pdf]
